# Supplementary material for: Proton Therapy and Src Family Kinase Inhibitor Combined Treatments on U87 Human Glioblastoma Multiforme Cell Line
Source: PubMed Central journal article supplement (PMC6801826; doi:10.3390/ijms20194745), 2019-09-24
Supplement: ijms-20-04745-s001.pdf [file ijms-20-04745-s001.pdf]

**Table S1. Pubmatrix analysis**

|              | <b>Cancer</b> | <b>Glioblastoma</b> | <b>Radiation</b> | <b>SRC</b> | <b>Ionizing<br/>Radiation</b> | <b>Apoptosis</b> | <b>Inflammation</b> | <b>DNA<br/>repair</b> | <b>DNA<br/>damage</b> | <b>Radioresistance</b> |
|--------------|---------------|---------------------|------------------|------------|-------------------------------|------------------|---------------------|-----------------------|-----------------------|------------------------|
| <b>SRC</b>   | 12616         | 201                 | 647              | 35709      | 189                           | 3226             | 1314                | 124                   | 271                   | 19                     |
| <b>STAT3</b> | 10679         | 410                 | 599              | 1139       | 135                           | 5138             | 3756                | 146                   | 314                   | 69                     |
| <b>CMYC</b>  | 456           | 6                   | 21               | 7          | 3                             | 171              | 16                  | 6                     | 16                    | 2                      |
| <b>CCND1</b> | 3607          | 52                  | 141              | 46         | 33                            | 1027             | 109                 | 96                    | 121                   | 9                      |
| <b>PI3K</b>  | 19176         | 709                 | 1215             | 1614       | 317                           | 10820            | 2866                | 471                   | 762                   | 140                    |
| <b>PDK1</b>  | 737           | 29                  | 38               | 62         | 11                            | 389              | 80                  | 9                     | 21                    | 4                      |
| <b>AKT</b>   | 37969         | 1358                | 2617             | 2886       | 783                           | 26010            | 5800                | 756                   | 1858                  | 279                    |
| <b>BAD</b>   | 7645          | 93                  | 970              | 86         | 137                           | 3893             | 1352                | 121                   | 411                   | 19                     |
| <b>MTOR</b>  | 16216         | 517                 | 959              | 344        | 202                           | 6657             | 1576                | 340                   | 663                   | 77                     |
| <b>KRAS</b>  | 11422         | 52                  | 475              | 71         | 46                            | 918              | 302                 | 459                   | 179                   | 12                     |
| <b>FOS</b>   | 5042          | 55                  | 1081             | 549        | 315                           | 1703             | 1381                | 204                   | 458                   | 6                      |
| <b>PXN</b>   | 351           | 6                   | 16               | 195        | 4                             | 75               | 28                  | 2                     | 8                     | 4                      |
